# Supplementary material for: 4'-Hydroxywogonin suppresses lipopolysaccharide-induced inflammatory responses in RAW 264.7 macrophages and acute lung injury mice
Source: PubMed Central journal article supplement (PMC5549707; doi:10.1371/journal.pone.0181191), 2017-08-08
Supplement: pone.0181191.s002.pdf [file pone.0181191.s002.pdf]

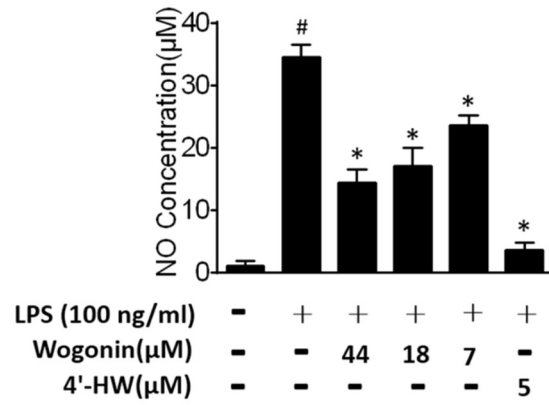

**S1 Fig. The comparison of the effects of 4'-HW and wogonin on LPS-induced production level of NO in RAW 264.7 macrophages.** Cells were treated with 4'-HW or wogonin for 1h prior to the addition of LPS (100 ng/mL) for an 24 h incubation. NO levels were determined with Griess reagent. The data shown represent the mean  $\pm$  SD of three independent experiments. # $p < 0.05$  vs the control group; \* $p < 0.05$  vs the LPS-treated group.
