# Supplementary material for: 4'-Hydroxywogonin suppresses lipopolysaccharide-induced inflammatory responses in RAW 264.7 macrophages and acute lung injury mice
Source: PubMed Central journal article supplement (PMC5549707; doi:10.1371/journal.pone.0181191), 2017-08-08
Supplement: pone.0181191.s003.pdf [file pone.0181191.s003.pdf]

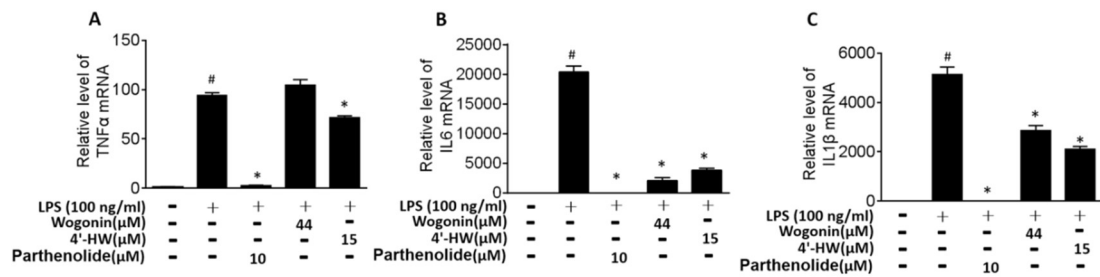

**S2 Fig. The comparison of the effects of 4'-HW and wogonin on LPS-induced expression of pro-inflammatory cytokines (A) TNF- $\alpha$ , (B) IL-6, and (C) IL-1 $\beta$  in RAW 264.7 macrophages.** Cells were treated with 4'-HW or wogonin or parthenolide for 1 h prior to LPS stimulation (100 ng/mL, 4 h). The transcripts of TNF- $\alpha$ , IL-6 and IL-1 $\beta$  were determined by quantitative real-time PCR. The data shown represent the mean  $\pm$  SD of three independent experiments. # $p$ <0.05 vs the control group; \* $p$ <0.05 vs the LPS-treated group.
